# Supplementary material for: Effects of different metal ions on the fluorescence of CdSe/ZnS quantum dots capped with various thiolate ligands
Source: Royal Society of Chemistry journal article supplement (doi:10.1039/c3cp52666f), 2013-01-01
Supplement: c3cp52666f.pdf [file c3cp52666f.pdf]

Supplementary Information for:

## Effects of Different Metal Ions on the Fluorescence of CdSe/ZnS Quantum Dots Capped with Various Thiolate Ligands

Tao Zeng,<sup>a,b</sup> Yanxi Hu,<sup>c</sup> Na Wang,<sup>b</sup> Chuanqin Xia,<sup>c</sup> Shoujian Li,<sup>c</sup> Yan Zu,<sup>b</sup>  
Lei Liu,<sup>b</sup> Zhiyi Yao,<sup>b</sup> Yuliang Zhao,<sup>a,b</sup> and Hai-Chen Wu<sup>\*b</sup>

<sup>a</sup>National Center for Nanoscience and Technology of China, Beijing 100190, China. E-mail: [zhaoyl@nanoctr.cn](mailto:zhaoyl@nanoctr.cn)

<sup>b</sup>Key Laboratory for Biomedical Effects of Nanomaterials & Nanosafety, Institute of High Energy Physics, Chinese Academy of Sciences, Beijing 100049, China. E-mail: [haichenwu@ihep.ac.cn](mailto:haichenwu@ihep.ac.cn)

<sup>c</sup>College of Chemistry, Sichuan University, Chengdu, Sichuan 610064, China

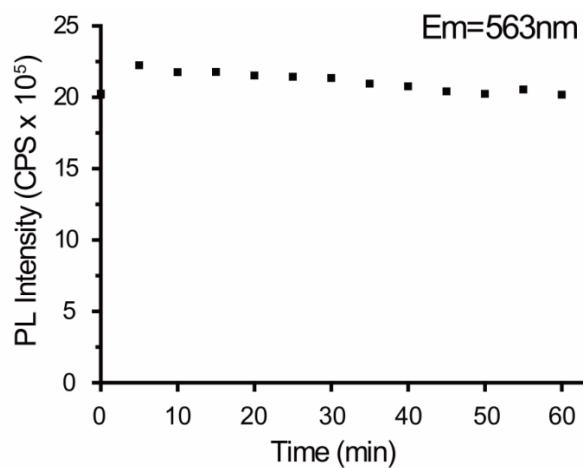

**Fig. S1** Fluorescence stability test of Cys-QDs ( $\lambda_{em} = 563$  nm). The PL spectra were recorded at an interval of 5 minutes in phosphate buffer (20 mM, pH 7.2),  $\lambda_{ex} = 350$  nm.

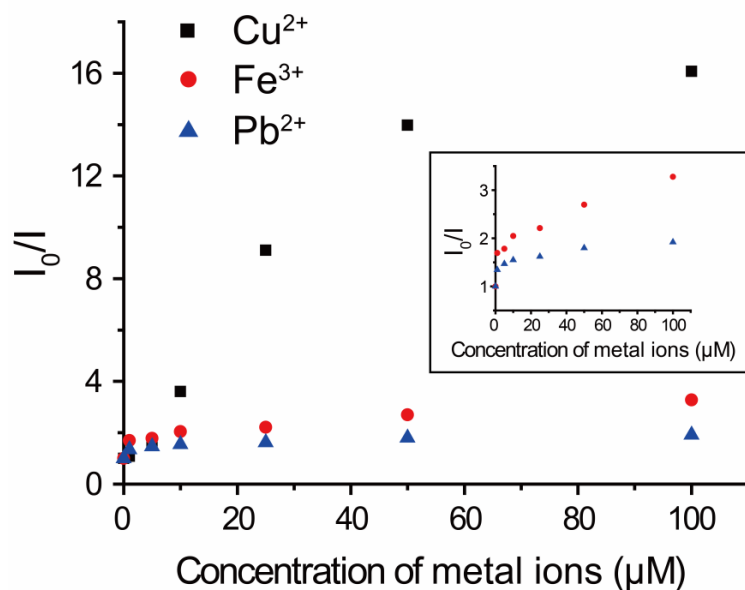

**Fig. S2** Stern-Volmer plots for the PL quenching of MPA-QDs in the presence of various concentrations of Cu<sup>2+</sup>, Fe<sup>3+</sup>, and Pb<sup>2+</sup>, respectively. Inset: expanded view of the Stern-Volmer plots for Fe<sup>3+</sup> and Pb<sup>2+</sup> group. The PL data were obtained in phosphate buffer (20 mM, pH 7.2), λ<sub>ex</sub> = 350 nm. C<sub>[metal ions]</sub> = 0, 1, 5, 10, 25, 50, 100 μM.

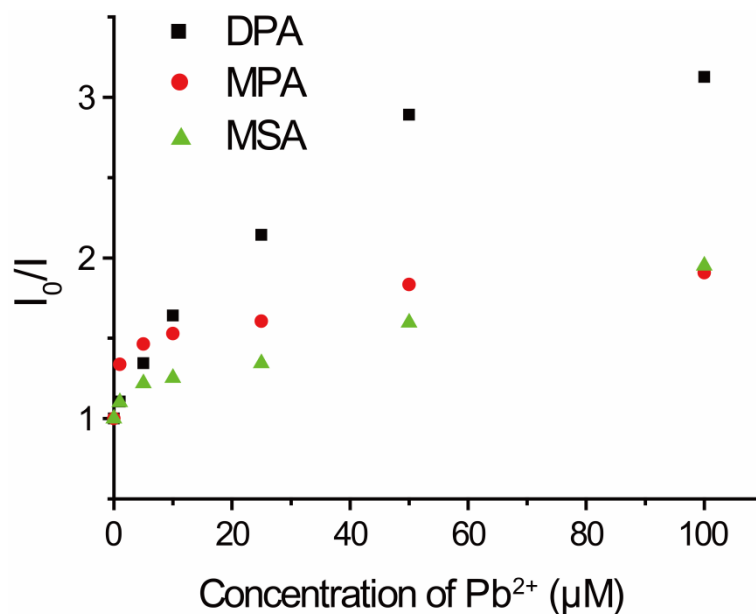

**Fig. S3** Stern-Volmer plots for the PL quenching of DPA-QDs, MPA-QDs, and MSA-QDs in the presence of various concentrations of Pb<sup>2+</sup>. The PL data were obtained in phosphate buffer (20 mM, pH 7.2), λ<sub>ex</sub> = 350 nm. C<sub>[Pb]</sub> = 0, 1, 5, 10, 25, 50, 100 μM.

In addition to the fluorescence recovery experiments, we also performed fluorescence decay experiments to investigate the mechanisms of fluorescence quenching induced by metal ions (Fig. S4 and Table S1). All the obtained PL decay curves could be well fitted by a biexponential function:

$$I(t) = a_1 \exp(-t/\tau_1) + a_2 \exp(-t/\tau_2)$$

The derived QD lifetimes are comprised of two parts: short-lived component ( $\tau_1$ ) and long-lived component ( $\tau_2$ ), where the former is associated with core-state recombination and the latter attributed to surface-related emission.<sup>1-2</sup> Fig. S4 shows three typical PL decay curves for Cys-QDs before and after the addition of  $\text{Cu}^{2+}$  and  $\text{Ni}^{2+}$ . The corresponding time-resolved fluorescence parameters were summarised in Table S1. As can be clearly seen, the addition of 5  $\mu\text{M}$   $\text{Cu}^{2+}$  could induce a significant decrease of QD lifetime. Furthermore, the intensity average lifetime  $\langle \tau_{i0} \rangle$  and amplitude average lifetime  $\langle \tau_{a0} \rangle$  were reduced from 14.39 ns and 8.46 ns to 6.19 ns and 1.28 ns, respectively.

$$\langle \tau_{i0} \rangle = (a_1 \tau_1^2 + a_2 \tau_2^2) / (a_1 \tau_1 + a_2 \tau_2)$$

$$\langle \tau_{a0} \rangle = (a_1 \tau_1 + a_2 \tau_2) / (a_1 + a_2)$$

More importantly, the contribution of long-lived emission to the total PL intensity dramatically decreased in the presence of 5  $\mu\text{M}$   $\text{Cu}^{2+}$ , which was indicative of destruction of the surface state of QDs,<sup>2</sup> in accordance with the fluorescence recovery experiments. On the other hand, the average lifetime  $\langle \tau_{i0} \rangle$  and  $\langle \tau_{a0} \rangle$  were much less affected by the introduction of  $\text{Ni}^{2+}$ . And only a slight decrease was observed in the contribution of long-lifetime component  $\tau_2$ , implying that the Cys-QD surface was almost intact when exposed to  $\text{Ni}^{2+}$ .

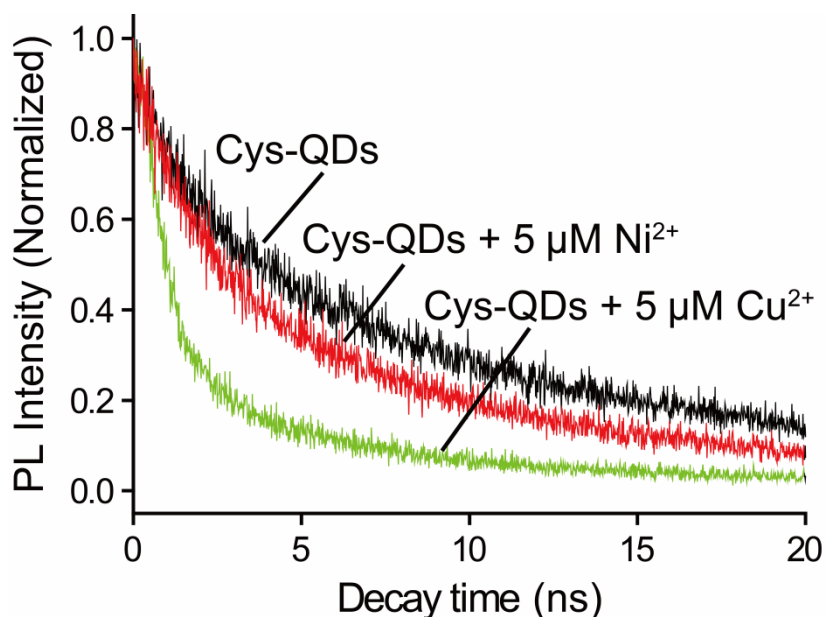

**Fig. S4** Fluorescence decay profiles of Cys-QDs in the absence or presence of  $\text{Cu}^{2+}$  (5  $\mu\text{M}$ ) and  $\text{Ni}^{2+}$  (5  $\mu\text{M}$ ), respectively. The luminescence of Cys-QDs was monitored at  $\lambda_{\text{max}} = 563$  nm with a 340 nm excitation laser in phosphate buffer (20 mM, pH 7.2).

**Table S1** Time-resolved fluorescence parameters of Cys-QDs for various concentrations of  $\text{Cu}^{2+}$  and  $\text{Ni}^{2+}$ . The luminescence of Cys-QDs was monitored at  $\lambda_{\text{max}} = 563$  nm with a 340 nm excitation laser in phosphate buffer (20 mM, pH 7.2).

| Metal ions [ $\mu\text{M}$ ] | $\tau_1$ [ns] ( $b_1$ ) <sup>[a]</sup> | $\tau_2$ [ns] ( $b_2$ ) <sup>[a]</sup> | $\langle\tau_{i0}\rangle$ <sup>[b]</sup> [ns] | $\langle\tau_{a0}\rangle$ <sup>[c]</sup> [ns] | $\chi^2$ |
|------------------------------|----------------------------------------|----------------------------------------|-----------------------------------------------|-----------------------------------------------|----------|
| 0                            | 2.66 (0.19)                            | 17.12 (0.81)                           | 14.39                                         | 8.46                                          | 1.03     |
| 1 ( $\text{Cu}^{2+}$ )       | 1.52 (0.24)                            | 14.60 (0.76)                           | 11.49                                         | 4.79                                          | 1.28     |
| 5 ( $\text{Cu}^{2+}$ )       | 0.61 (0.44)                            | 10.67 (0.56)                           | 6.19                                          | 1.28                                          | 1.67     |
| 1 ( $\text{Ni}^{2+}$ )       | 2.39 (0.22)                            | 15.91 (0.78)                           | 12.96                                         | 7.12                                          | 1.06     |
| 5 ( $\text{Ni}^{2+}$ )       | 2.23 (0.28)                            | 13.97 (0.72)                           | 10.72                                         | 5.69                                          | 1.13     |

[a]: Contribution of  $\tau_i$  is given as  $b_i$ ,  $b_i = a_i \tau_i / (a_1 \tau_1 + a_1 \tau_2)$ .

[b]: Intensity average lifetime  $\langle\tau_{i0}\rangle$  is calculated as  $\langle\tau_{i0}\rangle = (a_1 \tau_1^2 + a_1 \tau_2^2) / (a_1 \tau_1 + a_1 \tau_2)$ .

[c]: Amplitude average lifetime  $\langle\tau_{a0}\rangle$  is calculated as  $\langle\tau_{a0}\rangle = (a_1 \tau_1 + a_1 \tau_2) / (a_1 + a_1)$ .

## References

- 1 X. Y. Wang, L. H. Qu, J. Y. Zhang, X. G. Peng and M. Xiao, *Nano. Lett.*, 2003, **3**, 1103-1106.
- 2 K. Santhosh, S. Patra, S. Soumya, D. C. Khara and A. Samanta, *ChemPhysChem*, 2011, **12**, 2735-2741.
